# Supplementary material for: Inhibiting the decomposition of methylammonium using cations with low deprotonation energy
Source: Royal Society of Chemistry journal article supplement (doi:10.1039/d2ta05753k), 2022-01-01
Supplement: d2ta05753k9.pdf [file d2ta05753k9.pdf]

## Supporting Information

### Inhibiting the decomposition of methylammonium using the cations with low deprotonation energy

Tingwei Zhou<sup>\*a</sup>, Jiangzhao Chen<sup>\*b</sup>, Anlong Kuang<sup>a</sup>

<sup>a</sup>Chongqing key Laboratory of Micro & Nano Structure Optoelectronics, School of Physical Science and Technology, Southwest University, Chongqing 400715, China. E-mail: twzhou@swu.edu.cn

<sup>b</sup>Key Laboratory of Optoelectronic Technology & Systems (Ministry of Education), College of Optoelectronic Engineering, Chongqing University, Chongqing 400044, China. E-mail: jiangzhaochen@cqu.edu.cn

**Table S1.**  $E_{PA}$  and  $E'_{PA}$  are the calculated and experimental proton affinities (eV) of the corresponding molecules, respectively.  $E_{VD}$  is the vertical deprotonation energy (eV) of the corresponding cation. Herein, all calculations are implemented using the free energies.

| Molecules                         | Cations                                         | $E_{PA}$ (eV) | $E'_{PA}$ (eV)         | $E_{VD}$ (eV) |
|-----------------------------------|-------------------------------------------------|---------------|------------------------|---------------|
| H <sub>2</sub> O                  | H <sub>3</sub> O <sup>+</sup>                   | 6.98          | 6.98 <sup>S1</sup>     | 7.01          |
| (H <sub>2</sub> O) <sub>2</sub>   | H <sub>5</sub> O <sub>2</sub> <sup>+</sup>      | 8.16          | 8.08 <sup>S2</sup>     | 8.99          |
| NHCHNH <sub>2</sub>               | (NH <sub>2</sub> ) <sub>2</sub> CH <sup>+</sup> | 9.73          | ---                    | 9.95          |
| CH <sub>3</sub> NH <sub>2</sub>   | CH <sub>3</sub> NH <sub>3</sub> <sup>+</sup>    | 9.12          | 9.34 <sup>S3</sup>     | 9.19          |
| (CH <sub>3</sub> ) <sub>3</sub> N | (CH <sub>3</sub> ) <sub>3</sub> NH <sup>+</sup> | 9.65          | 9.84 <sup>S4,S5</sup>  | 9.75          |
| NH <sub>3</sub>                   | NH <sub>4</sub> <sup>+</sup>                    | 8.63          | 8.85 <sup>S3</sup>     | 8.64          |
| HF                                | H <sub>2</sub> F <sup>+</sup>                   | 4.92          | 5.03 <sup>S4,5</sup>   | 4.93          |
| CH <sub>2</sub> O                 | CH <sub>2</sub> OH <sup>+</sup>                 | 7.24          | 7.20 <sup>S1,4,5</sup> | 7.33          |
| CH <sub>3</sub> OH                | CH <sub>3</sub> OH <sub>2</sub> <sup>+</sup>    | 7.67          | 7.80 <sup>S1,4,5</sup> | 7.85          |
| LiOH                              | LiOH <sub>2</sub> <sup>+</sup>                  | 10.12         | 10.40 <sup>S1</sup>    | 10.36         |

To calculate the total free energy of H<sup>+</sup> ( $E_{H^+}$ ) using the equation of  $E_{H^+} = 6.98 \text{ eV} + E_{H_3O^+} - E_{H_2O}$ , the experimental proton affinity of 6.98 eV of H<sub>2</sub>O was employed<sup>S1</sup>, where  $E_{H_3O^+}$  and  $E_{H_2O}$  are the total

free energies of  $\text{H}_3\text{O}^+$  and  $\text{H}_2\text{O}$ , respectively. The proton affinities of the molecules were estimated by the equation of  $E_{PA} = E_{\text{H}^+} + E_M - E_C$ , where  $E_M$  and  $E_C$  are the total free energies of the corresponding molecules and cations, respectively. As shown in Table S1, the calculation proton affinities are very consistent with the experiment proton affinities. For instance, the proton affinities of 8.16 and 9.12 eV were obtained for  $(\text{H}_2\text{O})_2$  and  $\text{CH}_3\text{NH}_2$  molecules, which are in good agreement with the experimental values<sup>s2,3</sup> of 8.08 and 9.28 eV, respectively. The vertical deprotonation energy ( $E_{VD}$ ) of cations was calculated by the equation of  $E_{VD} = E_{\text{H}^+} + E_{M'} - E_C$ , where  $E_{M'}$  is the free energy of the structure of the cation without  $\text{H}^+$ . The structural relaxation from the direct deprotonation structure to the deprotonation molecule structure of the cations can be estimated by comparing  $E_{VD}$  with  $E_{PA}$ , such as  $E_{PA}$  of 8.16 and  $E_{VD}$  of 7.01 eV for  $\text{H}_3\text{O}^+$ , suggesting that the  $\text{H}_2\text{O}$  molecule and the  $\text{H}_2\text{O}$  part of  $\text{H}_3\text{O}^+$  is very similar in structure.

**Table S2.** Herein,  $t$ ,  $E_{\text{H-bond}}$ ,  $E_g$ ,  $V_{oc}$ ,  $J_{sc}$  and  $\eta$  are the tolerance factor, the hydrogen bond energy (eV/a-site-cation), the band gap (eV), the maximum short circuit current density (mA/cm<sup>2</sup>), open circuit voltages (V), and the PCE (%), respectively.

| Perovskites                                                                              | $t$  | $E_{\text{H-bond}}$ | $E_g$ | $V_{oc}$ | $J_{sc}$ | $\eta$ |
|------------------------------------------------------------------------------------------|------|---------------------|-------|----------|----------|--------|
| MAPbI <sub>3</sub>                                                                       | 0.96 | 0.31                | 1.60  | 1.33     | 25.47    | 30.58  |
| MA <sub>0.9375</sub> (H <sub>5</sub> O <sub>2</sub> ) <sub>0.0625</sub> PbI <sub>3</sub> | 0.95 | 0.30                | 1.55  | 1.28     | 27.26    | 31.50  |
| MA <sub>0.875</sub> (H <sub>5</sub> O <sub>2</sub> ) <sub>0.125</sub> PbI <sub>3</sub>   | 0.94 | 0.33                | 1.67  | 1.39     | 23.38    | 29.58  |
| MA <sub>0.5</sub> (H <sub>5</sub> O <sub>2</sub> ) <sub>0.5</sub> PbI <sub>3</sub>       | 0.90 | 0.26                | 1.68  | 1.40     | 23.06    | 29.39  |
| H <sub>5</sub> O <sub>2</sub> PbI <sub>3</sub>                                           | 0.85 | 0.22                | 1.72  | 1.44     | 21.91    | 28.73  |

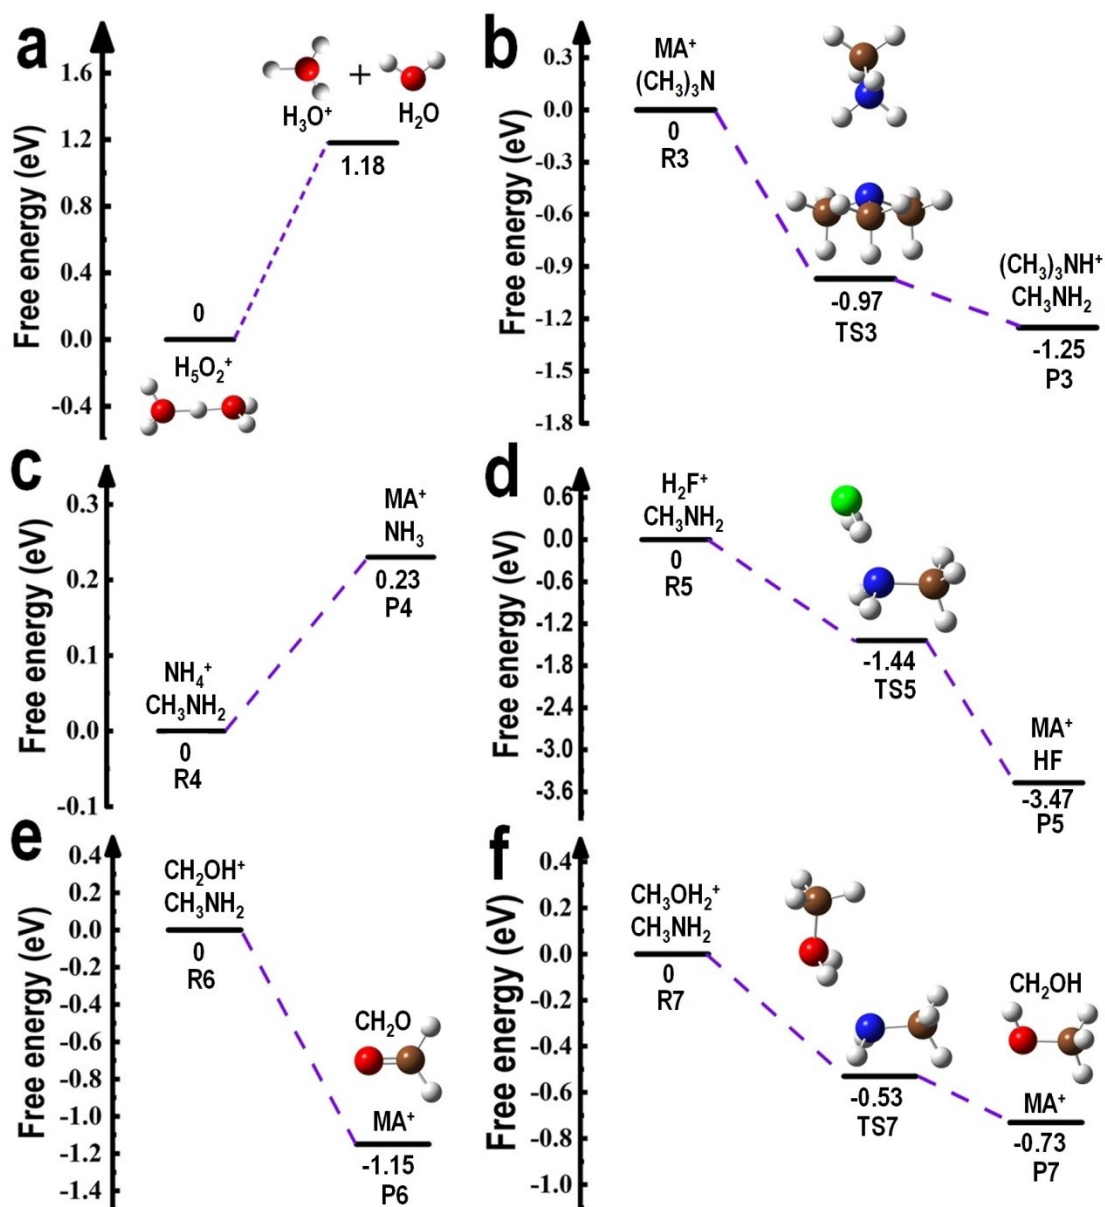

**Fig. S1.** (a) The free energy of  $\text{H}_2\text{O}$  molecule and  $\text{H}_3\text{O}^+$  cation, and  $\text{H}_5\text{O}_2^+$  cation, respectively. (b-f) The proton transfer from  $(\text{CH}_3)_3\text{NH}^+$ ,  $\text{NH}_4^+$ ,  $\text{H}_2\text{F}^+$ ,  $\text{CH}_2\text{OH}^+$ , and  $\text{CH}_3\text{OH}_2^+$  cations to  $\text{CH}_3\text{NH}_2$  molecule to form  $\text{MA}^+$  cation, respectively. Atomic colors: H (white), C (coffee), N (blue), O (red) and F (green).

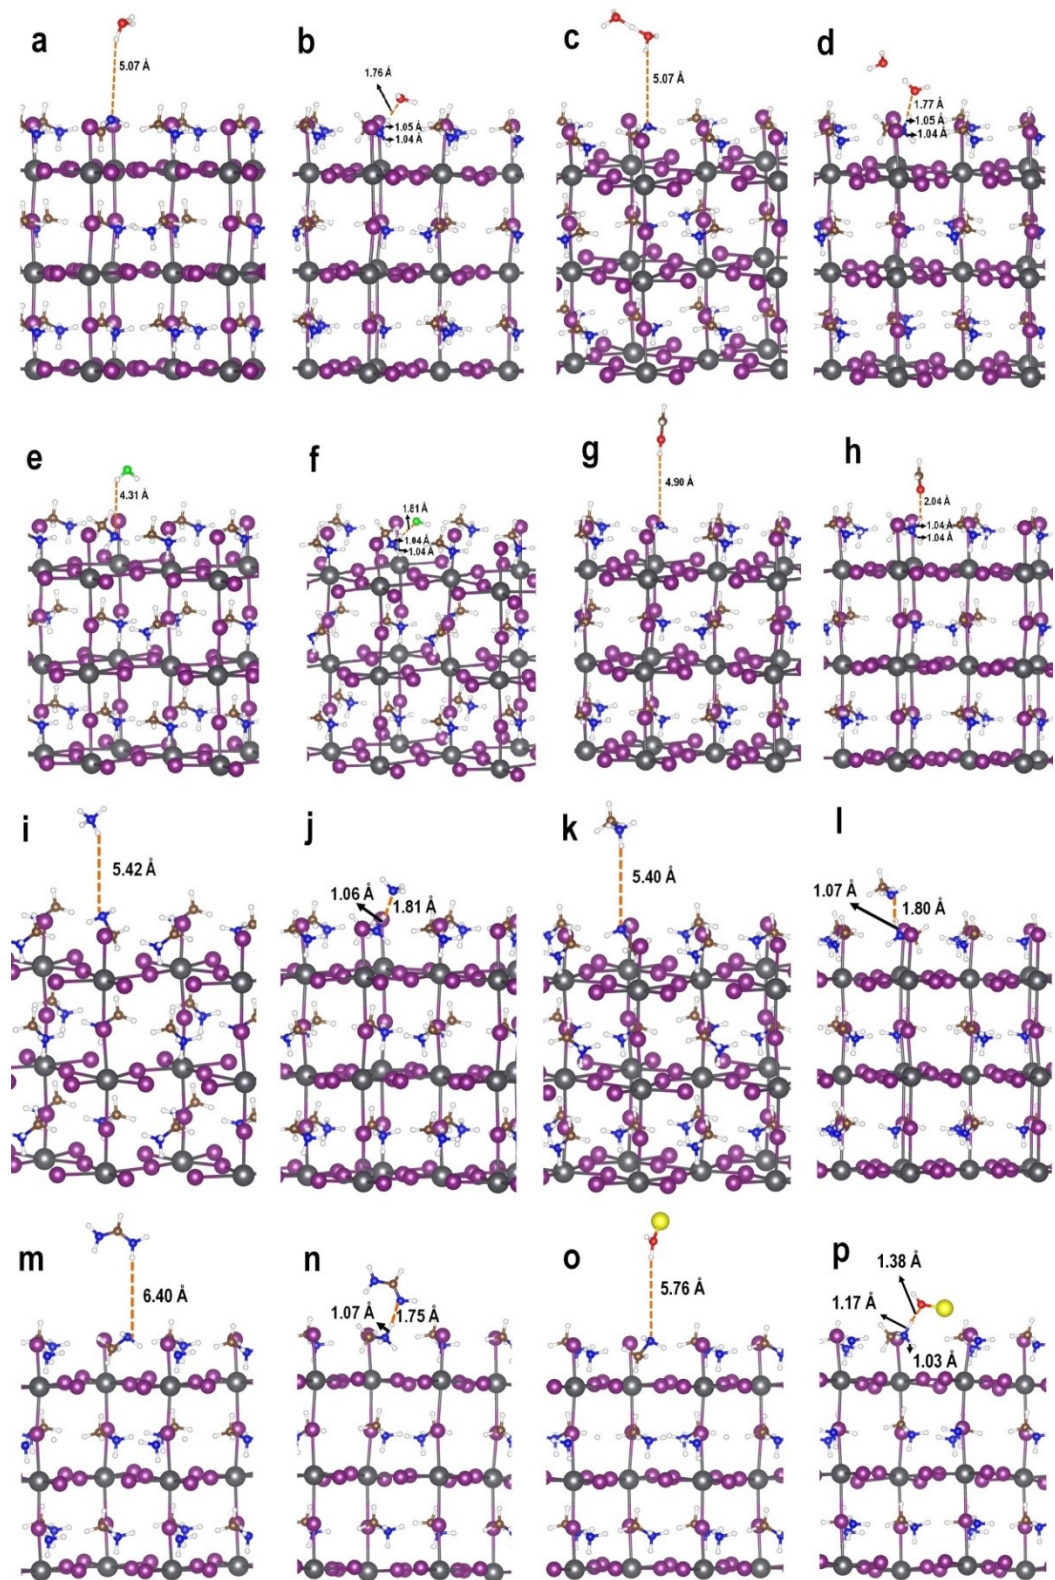

**Fig. S2.** The initial and optimal structures for the (001) MAI plane of the MAPbI<sub>3</sub> perovskite with H<sub>3</sub>O<sup>+</sup> (a) and (b), H<sub>5</sub>O<sub>2</sub><sup>+</sup> (c) and (d), H<sub>2</sub>F<sup>+</sup> (e) and (f), CH<sub>2</sub>OH<sup>+</sup> (g) and (h), NH<sub>4</sub><sup>+</sup> (i) and (j), MA<sup>+</sup> (k) and (l), FA<sup>+</sup> (m) and (n), and H<sub>2</sub>OLi<sup>+</sup> (o) and (p) cations, respectively. Atomic colors: H (white), Li (yellow), C (coffee), N (blue), O (red), F (green), I (violet) and Pb (grey).

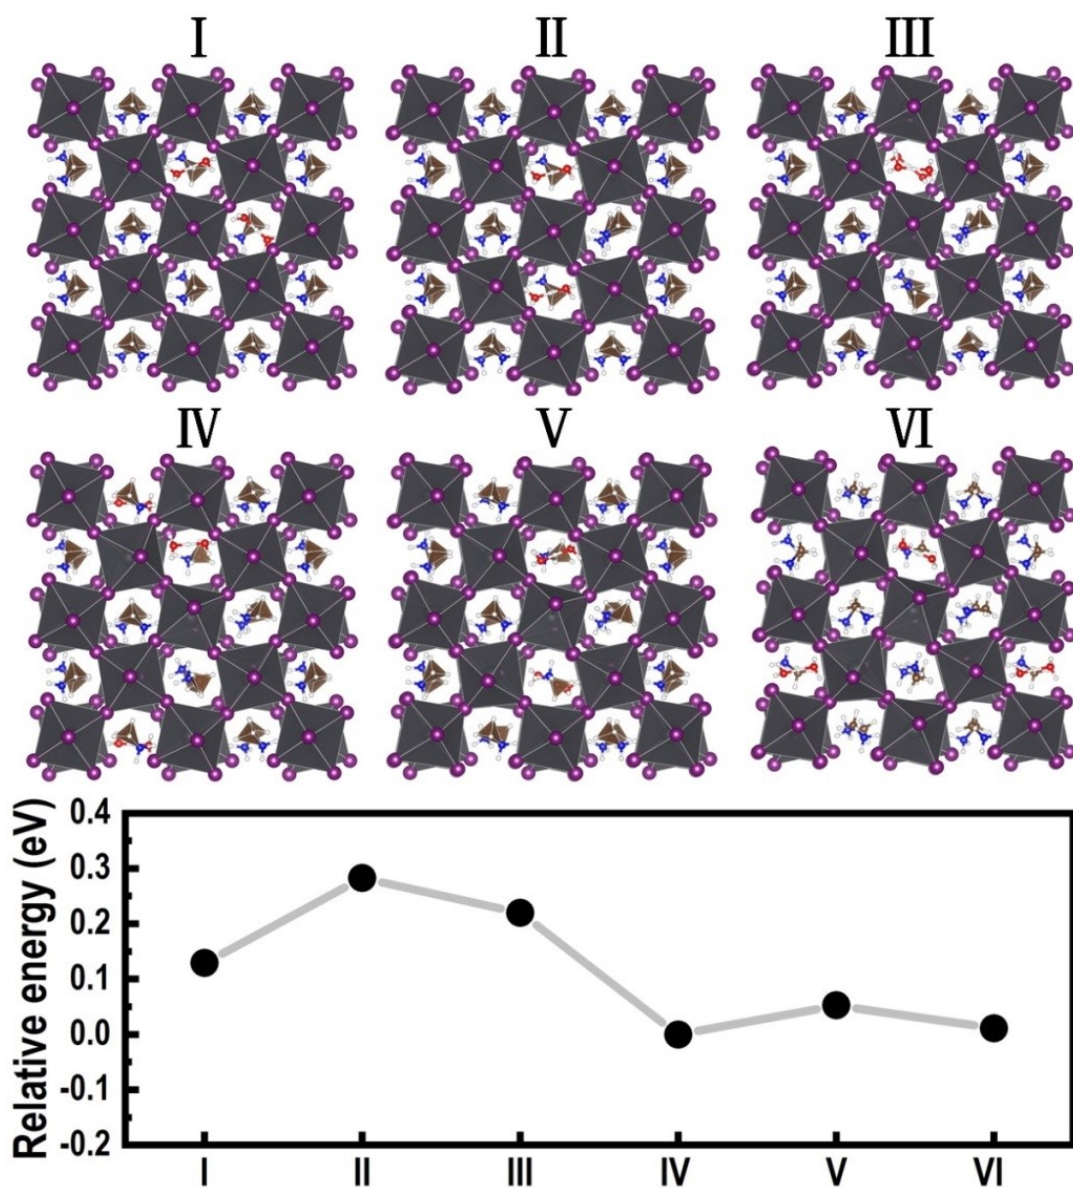

**Fig. S3.** Six possible structures of the  $\text{MA}_{0.875}(\text{H}_5\text{O}_2)_{0.125}\text{PbI}_3$  perovskite with a tetragonal crystal structure and  $2 \times 2 \times 1$  supercell. Their relative energies ( $E_R$ ) are obtained by the equation of  $E_R = E_X - E_{\text{IV}}$ , where  $E_X$  and  $E_{\text{IV}}$  represent the total energies of X (X = I, II, III, IV, V, or VI) and IV structures. Atomic colors: H (white), C (coffee), N (blue), O (red), I (violet) and Pb (grey).

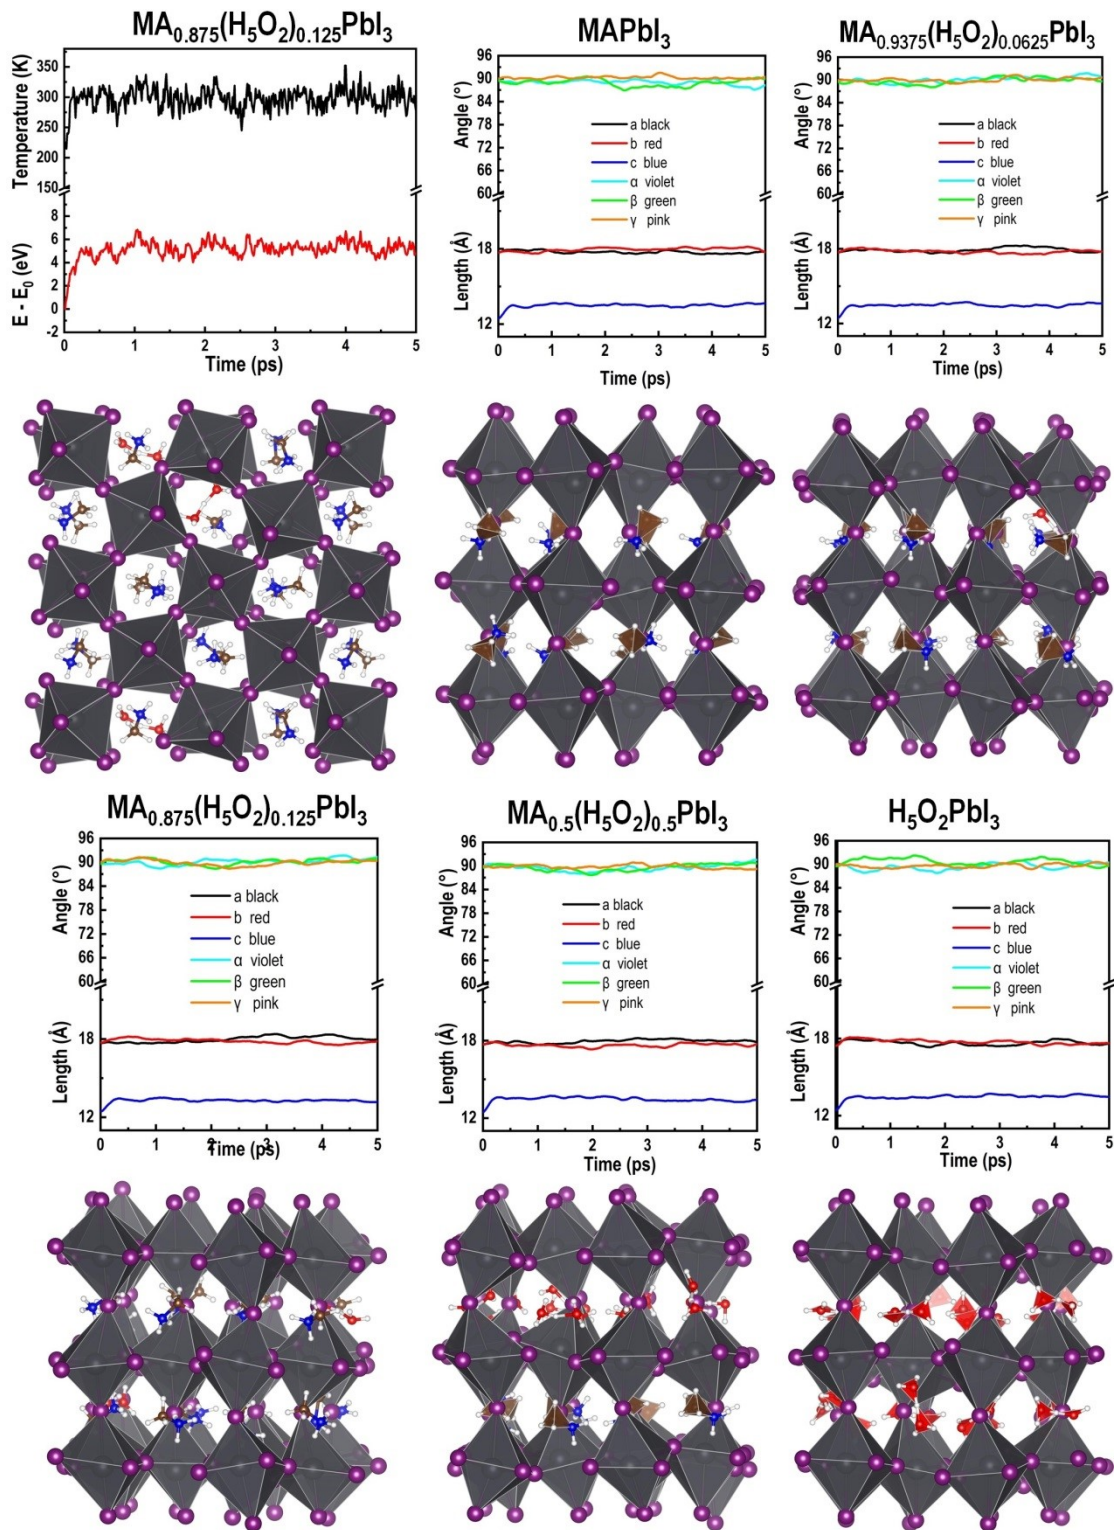

**Fig. S4.** Ab initio molecular dynamics (AIMD) simulation for the energy, temperature, lattice parameters and structure of the  $\text{MA}_{1-x}(\text{H}_5\text{O}_2)_x\text{PbI}_3$  ( $x = 0, 1/16, 1/8, 1/2, \text{ or } 1$ ) perovskites with a tetragonal crystal structure and  $2 \times 2 \times 1$  supercell under 300 K,  $10^5$  Pa and AIMD simulation of 5 ps, respectively. Atomic colors: H (white), C (coffee), N (blue), O (red), I (violet) and Pb (grey).

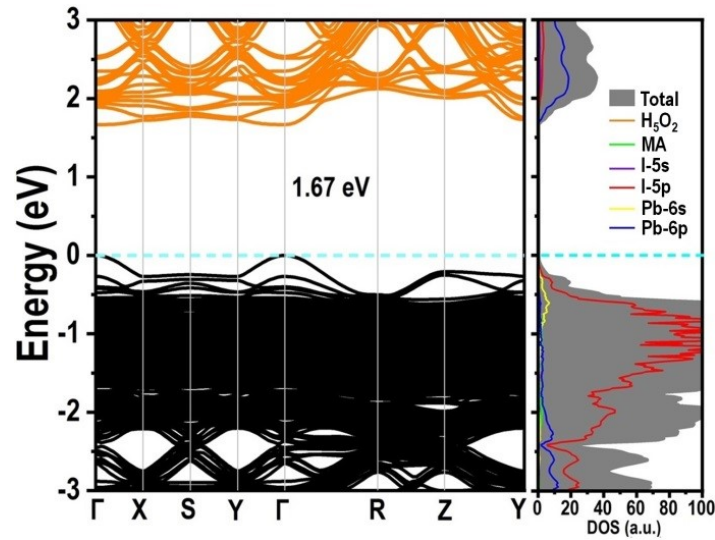

**Fig. S5.** The calculated band structures, and total/partial DOSs for the  $\text{MA}_{0.875}(\text{H}_5\text{O}_2)_{0.125}\text{PbI}_3$  perovskite with a tetragonal crystal structure and  $2 \times 2 \times 1$  supercell. The dotted line is Fermi level.

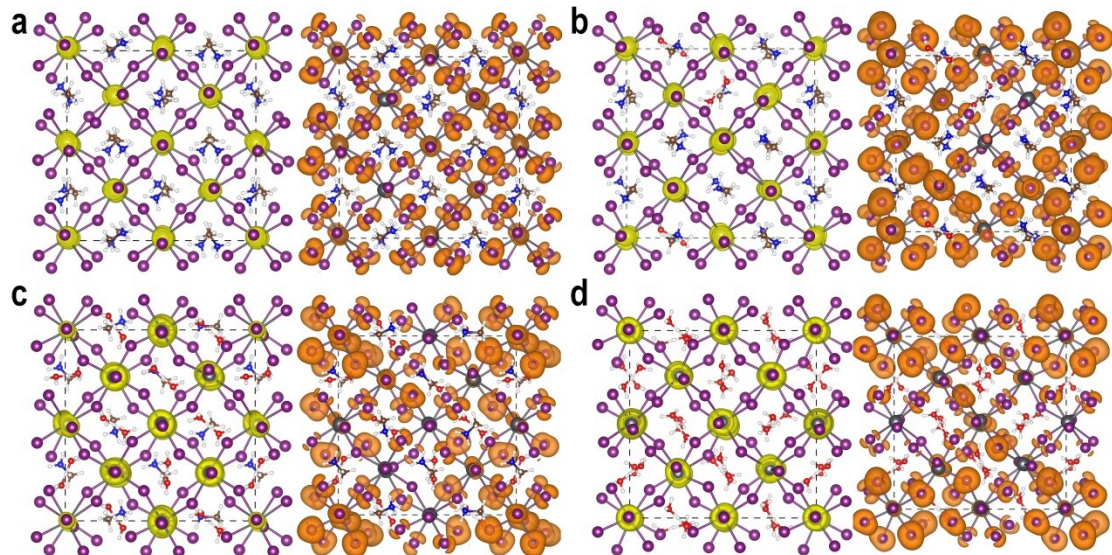

**Fig. S6.** The partial charge density of the CBM (yellow) and VBM (orange) states (isovalue =  $0.002 \text{ e}/\text{\AA}^3$ ) for the  $\text{MA}_{1-x}(\text{H}_5\text{O}_2)_x\text{PbI}_3$  perovskites with a tetragonal crystal structure and  $2 \times 2 \times 1$  supercell, (a)  $x = 0$ , (b)  $1/8$ , (c)  $1/2$  and (d)  $1$ , respectively. Atomic colors: H (white), C (coffee), N (blue), O (red), I (violet) and Pb (grey).

## References

- S1 E. P. Hunter and S. G. Lias, *J. Phys. Chem. Ref. Data* 1998, **27**, 413-656.
- S2 D. J. Goebbert and P. G. Wenthold, *Eur. J. Mass Spectrom.* 2004, **10**, 837-845.
- S3 J. E. Szulejko and T. B. McMahon, *J. Am. Chem. Soc.* 1993, **115**, 7839-7848.
- S4 J. L. Beauchamp, *Annu. Rev. Phys. Chem.* 1971, **22**, 527-561.
- S5 P. Kollman and S. Rothenberg, *J. Am. Chem. Soc.* 1977, **99**, 1333-1342.
